# Supplementary material
Source: Springer Nature journal article supplement (https://www.springermedizin.de/resource/supplementary/12885_2009_2325_MOESM4_ESM.pdf/9461026)

**A**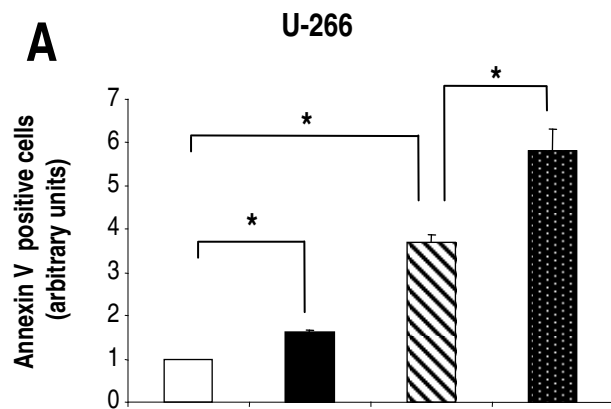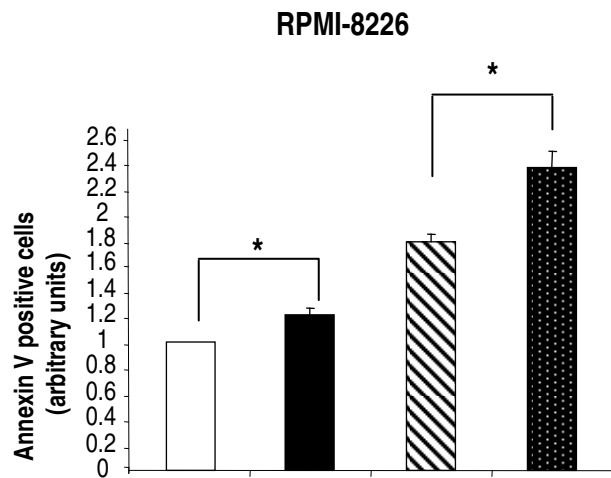

SB415286 (4μM): - + - +  
 BZ (5nM): - - + +

**B**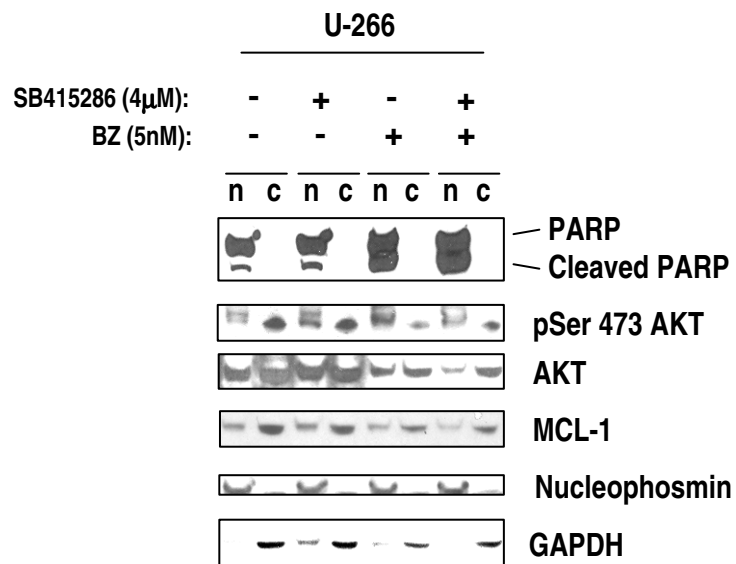

Supplement: MOESM4 [file 9461026]
